# Supplementary material for: EGCG’s anticancer potential unveiled: triggering apoptosis in lung cancer cell lines through in vitro investigation
Source: PeerJ. 2025 Mar 26;13:e19135. doi: 10.7717/peerj.19135 (PMC11954466; doi:10.7717/peerj.19135)
Supplement: Supplemental Information 1 [file peerj-13-19135-s001.xlsx]

## Sheet: SHEET 1
	H1299 EGCG Concentration Inhibitory effect (%)				A549 EGCG Concentration Inhibitory effect (%)				H1299 EGCG Concentration Apoptosis rate (%)				A549 EGCG Concentration Apoptosis rate (%)				H1299 Concentrations (µM) (PI3K)				H1299 Concentrations (µM) (p-PI3K)				H1299 Concentrations (µM) (AKT)				H1299 Concentrations (µM) (pAKT)				A549 Concentrations (µM) (PI3K)				A549 Concentrations (µM) (p-PI3K)				A549 Concentrations (µM) AKT				A549 Concentrations (µM) pAKT
Sr.No	0	5	30	50	0	5	30	50	0	5	30	50	0	5	30	50	0	5	30	50	0	5	30	50	0	5	30	50	0	5	30	50	0	5	30	50	0	5	30	50	0	5	30	50	0	5	30	50
1	100	94	72	41	100	88	69	44	2	12	28	46	4	17	32	56	1.2	1.2	1.2	1.2	0.7	0.54	0.41	0.32	0.4	0.38	0.33	0.39	0.4	0.32	0.21	0.19	1.37	1.4	1.4	1.4	0.8	0.69	0.54	0.48	0.6	0.41	0.29	0.3	0.39	0.31	0.22	0.15
2	100	95	75	40	99	87	70	40	4	13	28	45	4	17	32	56	1.1	1	1.3	1.23	0.6	0.55	0.42	0.31	0.5	0.39	0.31	0.38	0.5	0.31	0.22	0.2	1.38	1.5	1.3	1.3	0.87	0.7	0.52	0.47	0.6	0.42	0.27	0.33	0.37	0.31	0.2	0.15
3	98	93	77	42	98	86	72	42	2	11	26	44	5	14	30	54	1.2	1.3	1.2	1.3	0.5	0.54	0.43	0.33	0.6	0.38	0.32	0.39	0.6	0.3	0.21	0.18	1.37	1.4	1.2	1.5	0.83	0.68	0.51	0.48	0.7	0.42	0.32	0.31	0.38	0.33	0.25	0.16
4	99	94	71	44	99	82	65	48	1	10	27	48	3	16	31	57	1.3	1	1.3	1.4	0.4	0.52	0.42	0.31	0.4	0.37	0.33	0.37	0.5	0.33	0.2	0.19	1.36	1.3	1.1	1.4	0.81	0.63	0.53	0.47	0.8	0.41	0.36	0.3	0.39	0.34	0.24	0.17
5	99	92	68	37	100	94	69	44	3	15	22	47	4	19	34	58	1.2	1.2	1.2	1.5	0.8	0.53	0.47	0.32	0.4	0.39	0.34	0.36	0.4	0.35	0.23	0.17	1.35	1.4	1.4	1.3	0.82	0.67	0.54	0.49	0.7	0.43	0.27	0.25	0.35	0.32	0.28	0.14

## Sheet: SHEET 2 
H1299								A549
OD SPECTROPHOTOMETER ANALYSIS					% CELL VIABILITY			OD SPECTROPHOTOMETER ANALYSIS					% CELL VIABILITY
Control (0 μM)	5 μM EGCG	30 μM EGCG	50 μM EGCG	Blank (media only)	5 μM EGCG	30 μM EGCG	50 μM EGCG	Control (0 μM)	5 μM EGCG	30 μM EGCG	50 μM EGCG	Blank (media only)	5 μM EGCG	30 μM EGCG	50 μM EGCG
1.26	0.95	0.665	0.42	0.095	73.3906	48.927	27.897	1.25	0.98	0.68	0.43	0.09	76.7241	50.8621	29.3103
1.27	0.965	0.68	0.43	0.1	73.9316	49.5726	28.2051	1.29	0.96	0.66	0.47	0.1	72.2689	47.0588	31.0924
1.255	0.945	0.67	0.415	0.09	73.3906	49.7854	27.897	1.32	0.99	0.62	0.44	0.12	72.5	41.6667	26.6667
1.282	0.962	0.69	0.43	0.12	72.4613	49.0534	26.6781	1.28	0.97	0.63	0.43	0.11	73.5043	44.4444	27.3504
1.32	0.925	0.662	0.422	0.082	68.0937	46.8498	27.4637	1.32	0.92	0.66	0.42	0.082	67.6898	46.6882	27.3021
